# Supplementary material for: Cereal grain mineral micronutrient and soil chemistry data from GeoNutrition surveys in Ethiopia and Malawi
Source: PubMed Central journal article supplement (PMC9314434; doi:10.1038/s41597-022-01500-5), 2022-07-25
Supplement: 41597_2022_1500_MOESM14_ESM.pdf [file 41597_2022_1500_MOESM14_ESM.pdf]

*Supplementary file 2. Ethical approval, information sheet, and farmers' consent form in English and Chichewa for the Malawian GeoNutrition data collection.*

# Reference number: Ethical Approval Number BIO-1718-0004

## School of Sociology & Social Policy

### Application for Research Ethics Approval for Students and Staff

This form and any attachments must be completed, signed electronically, and submitted to **Redacted**

This application must be approved by the School of Sociology and Social Policy Research Ethics Committee (SSP-REC) before potential participants are approached to take part in any research. Any change in the design or conduct of the research over the course of the project should be reported to the SSP-REC and may require a new application for ethics approval. Please consult the School's Research Ethics website and reference where relevant the guidance on researcher safety, lone working, working abroad, the Mental Capacity Act 2005, research data management, etc.

### Application Checklist

Your application cannot be considered without certain evidence. You should provide documents to cover each of the questions below where your answer is 'yes', and tick to indicate the type of evidence you have enclosed. All forms and templates can be found on the Research Ethics website.

| Questions about your application                                                                                                                                                                                                                                                                                                                                                       | Evidence required                                                                 | Enclosed                            |
|----------------------------------------------------------------------------------------------------------------------------------------------------------------------------------------------------------------------------------------------------------------------------------------------------------------------------------------------------------------------------------------|-----------------------------------------------------------------------------------|-------------------------------------|
| Does the research project, dissertation/thesis or assignment involve human participants or their data (even if you judge it to be of minimal risk)?                                                                                                                                                                                                                                    | Application for Research Ethics Approval (this form)                              | <input checked="" type="checkbox"/> |
|                                                                                                                                                                                                                                                                                                                                                                                        | Participant Consent Form                                                          | <input checked="" type="checkbox"/> |
|                                                                                                                                                                                                                                                                                                                                                                                        | Participant Information Sheet                                                     | <input checked="" type="checkbox"/> |
| Is the research of a sensitive nature, i.e. involves vulnerable participants and/or is concerned with a sensitive topic?                                                                                                                                                                                                                                                               | An exemplar of any communication inviting individuals to participate in the study | <input type="checkbox"/>            |
|                                                                                                                                                                                                                                                                                                                                                                                        | An indicative list of survey or interview questions to be used in the study       | <input type="checkbox"/>            |
| Does the research involve data collection in the UK or overseas (even if you judge it to be of minimal risk)?<br><br>Overseas travel involving data collection is referred to the University's Insurance Office. Please consult the travel advice Flow Chart and Overseas Travel Guidance and <b>DO NOT</b> book travel or arrange fieldwork until your application has been approved. | Fieldwork Risk Assessment Form and Hazard Checklist                               | <input checked="" type="checkbox"/> |
| If the research is to be conducted outside the UK or involves international partners, is ethics review required by non-UK RECs? (NB It is unlikely UG students will get ethical approval)                                                                                                                                                                                              | Non-UK REC approval                                                               | <input type="checkbox"/>            |
| Does the research require approval from a UK REC other than the SSP-REC (e.g., NHS, HMPPS, Social Care)?                                                                                                                                                                                                                                                                               | External REC approval                                                             | <input type="checkbox"/>            |
| If you are a student, has your supervisor or tutor approved the project by signing this form (and any other documents requiring their signature)?                                                                                                                                                                                                                                      | Supervisor or tutor signature                                                     | <input type="checkbox"/>            |

## Reference number: Ethical Approval Number BIO-1718-0004

| Section 1: Applicant details   |                                                                                                                                                                                                               |
|--------------------------------|---------------------------------------------------------------------------------------------------------------------------------------------------------------------------------------------------------------|
| Name of researcher             | Redacted                                                                                                                                                                                                      |
| Role                           | <input type="checkbox"/> Undergraduate student<br><input type="checkbox"/> Postgraduate taught student<br><input type="checkbox"/> Postgraduate research student<br><input checked="" type="checkbox"/> Staff |
| Email address                  | Redacted                                                                                                                                                                                                      |
| Names of other project members | See Appendix C                                                                                                                                                                                                |

| To be completed by students only   |  |
|------------------------------------|--|
| Student ID number                  |  |
| Degree programme                   |  |
| Module name and number             |  |
| Supervisor, module leader or tutor |  |

| Section 2: Project details                                                                                                                                 |                                                                                                                                                                                                                                                                                                                                                           |
|------------------------------------------------------------------------------------------------------------------------------------------------------------|-----------------------------------------------------------------------------------------------------------------------------------------------------------------------------------------------------------------------------------------------------------------------------------------------------------------------------------------------------------|
| Project title                                                                                                                                              | <b>GeoNutrition (Work Package 1): Sampling soils and crops in Malawi</b>                                                                                                                                                                                                                                                                                  |
| Research question(s) or aim(s)                                                                                                                             | <b>Understanding the geospatial influence of soil quality on soil-to-grain transfer of micronutrients including iodine, iron, selenium and zinc</b>                                                                                                                                                                                                       |
| Method(s) of data collection                                                                                                                               | <b>Questionnaire and soil and crop sampling from farmers' fields, to be conducted by multiple field teams employed by Lilongwe University of Agriculture and Natural Resources (LUANAR, Malawi). See Appendix D for Standard Operating Procedures, Questionnaire, Data Management/Use, etc. See Appendix E for map of approximate sampling locations.</b> |
| Where and when will data collection take place (please consult the University's Lone Working, Working Abroad and Safe Conduct of Fieldwork guidelines)?    | <b>Late-April to early-June 2018 (Malawi)</b>                                                                                                                                                                                                                                                                                                             |
| How will data be managed and used (please consult the University's Code of Research Conduct and Research Ethics and School Research Data Management Plan)? | <b>All data will be managed and used according to the University's Code of Research Conduct and Research Ethics and School of Biosciences.</b>                                                                                                                                                                                                            |
| How will access to participants be gained?                                                                                                                 | <b>Participants will be selected by colleagues at Lilongwe University of Agriculture and Natural Resources (LUANAR, Malawi) after liaison with (1) national</b>                                                                                                                                                                                           |

**Reference number: Ethical Approval Number BIO-1718-0004**

|  |                                                                    |
|--|--------------------------------------------------------------------|
|  | <b>Government, (2) local authorities, (3) heads of households.</b> |
|--|--------------------------------------------------------------------|

| <b>Section 3: Questions about the appropriate REC to review the application</b>                                                                                                                                                                                                                                                                                                                                                                                                                                                           | <b>Yes</b>               | <b>No</b>                           |
|-------------------------------------------------------------------------------------------------------------------------------------------------------------------------------------------------------------------------------------------------------------------------------------------------------------------------------------------------------------------------------------------------------------------------------------------------------------------------------------------------------------------------------------------|--------------------------|-------------------------------------|
| Does the study involve recruitment of patients or staff through the NHS or the use of NHS data or premises and/or equipment?                                                                                                                                                                                                                                                                                                                                                                                                              | <input type="checkbox"/> | <input checked="" type="checkbox"/> |
| Does the study involve vulnerable adults who are unable to make an informed and free decision on their involvement in the research (e.g., those with a mental incapacity or prisoners) or involve children / adults who live within a social care setting?                                                                                                                                                                                                                                                                                | <input type="checkbox"/> | <input checked="" type="checkbox"/> |
| <p>If you have answered <b>'yes'</b> to either of the questions above, the SSP-REC may not be able to approve your project. You will need to send this completed form to the SSP-REC for reference and submit your research for ethics approval to the relevant external review board, e.g., HRA, HMPPS or SCREC. Once ethics approval is granted by the external review board, a copy should be sent to the SSP-REC for its records.</p> <p>NB – for the purposes of research in the UK, an adult is a person aged 16 years or over.</p> |                          |                                     |

|                                          |
|------------------------------------------|
| <b>Section 4: Ethical considerations</b> |
|------------------------------------------|

Please answer **ALL** of the following questions by ticking the appropriate box and providing additional information in the text box where required.

| <b>4.1: Questions about consent</b>                                                                                                                                                                                                                                                                                              | <b>Yes</b>               | <b>No</b>                           |
|----------------------------------------------------------------------------------------------------------------------------------------------------------------------------------------------------------------------------------------------------------------------------------------------------------------------------------|--------------------------|-------------------------------------|
| Will the research involve any participants who are known to be vulnerable due to: being aged under 16, residing in institutional care, having a learning disability, having a mental health condition, having physical or sensory impairments, previous life experiences (e.g., victims of abuse), other (please specify below)? | <input type="checkbox"/> | <input checked="" type="checkbox"/> |
| Will the study require the co-operation of a gatekeeper for initial access to the groups or individuals to be recruited (e.g., pupils at school, residents of nursing home)?                                                                                                                                                     | <input type="checkbox"/> | <input checked="" type="checkbox"/> |
| Will the research involve participants taking part without their knowledge or consent, deception or covert observation in any form?                                                                                                                                                                                              | <input type="checkbox"/> | <input checked="" type="checkbox"/> |
| Will the research involve access to personal information about identifiable individuals without their knowledge or consent?                                                                                                                                                                                                      | <input type="checkbox"/> | <input checked="" type="checkbox"/> |

If you have answered **'yes'** to any of the questions about consent, please explain why, and describe any steps you will take to deal with the ethical issues raised in the box below:

| <b>4.2: Questions about the potential for harm</b>                                                                                                                                                           | <b>Yes</b>               | <b>No</b>                           |
|--------------------------------------------------------------------------------------------------------------------------------------------------------------------------------------------------------------|--------------------------|-------------------------------------|
| If the research involves working with children and/or vulnerable adults, are there any reasons why you won't be able to follow the University's Guidance on the Safeguarding of Children and Adults at Risk? | <input type="checkbox"/> | <input checked="" type="checkbox"/> |
| Will the research expose participants to any risk of physical or emotional harm?                                                                                                                             | <input type="checkbox"/> | <input checked="" type="checkbox"/> |

## Reference number: Ethical Approval Number BIO-1718-0004

|                                                                                                                                                                                |                                     |                                     |
|--------------------------------------------------------------------------------------------------------------------------------------------------------------------------------|-------------------------------------|-------------------------------------|
| Will the research involve physically invasive procedures, the collection of bodily samples or the administering of drugs, placebos or other substances (e.g., vitamins, food)? | <input type="checkbox"/>            | <input checked="" type="checkbox"/> |
| Will the research involve discussion of sensitive issues (e.g., abuse, sexual activity, sexuality, drug use, serious illness, commercial or legally sensitive topics)?         | <input type="checkbox"/>            | <input checked="" type="checkbox"/> |
| Will the research involve access to personal information about identifiable individuals without their knowledge or consent?                                                    | <input type="checkbox"/>            | <input checked="" type="checkbox"/> |
| Will the research expose the researcher to any risk of physical or emotional harm?                                                                                             | <input checked="" type="checkbox"/> | <input type="checkbox"/>            |

If you have answered 'yes' to any of the questions about the potential for harm, please explain why, and describe any steps you will take to deal with the ethical issues raised in the box below:

There is a minor risk of physical harm to researchers, associated with sampling soils and crops from farmers' fields. These risks are addressed in the Risk Assessment section of Appendix D. This Risk Assessment is a dynamic document.

| <b>4.3: Questions about data collection</b>                                                                                                                                                                                                   | <b>Yes</b>                          | <b>No</b>                |
|-----------------------------------------------------------------------------------------------------------------------------------------------------------------------------------------------------------------------------------------------|-------------------------------------|--------------------------|
| Have you read the University's Research Code of Conduct guidelines, particularly section 4 on Data, and agree to abide by them?                                                                                                               | <input checked="" type="checkbox"/> | <input type="checkbox"/> |
| Will it be made clear that participation is unlikely to be of direct personal benefit to the individual?                                                                                                                                      | <input checked="" type="checkbox"/> | <input type="checkbox"/> |
| Will you refuse to offer incentives other than basic expenses such as cash payments and non-cash items such as vouchers or book tokens to potential participants as an inducement to participate in the research?                             | <input checked="" type="checkbox"/> | <input type="checkbox"/> |
| Before any data are collected, will participants be guaranteed anonymity only insofar as they do not disclose any illegal activities?                                                                                                         | <input checked="" type="checkbox"/> | <input type="checkbox"/> |
| Before any data are collected, will anonymity not be guaranteed where there is disclosure or evidence of significant harm, abuse, neglect or danger to participants or to others?                                                             | <input checked="" type="checkbox"/> | <input type="checkbox"/> |
| If fieldwork is to take place in private or unfamiliar settings (i.e., not in public and/or professional spaces) have you detailed what steps will be taken to ensure your safety in the Fieldwork Risk Assessment Form and Hazard Checklist? | <input checked="" type="checkbox"/> | <input type="checkbox"/> |
| Will participants be informed when observation and/or recording is taking place?                                                                                                                                                              | <input checked="" type="checkbox"/> | <input type="checkbox"/> |
| Will participants be free to withdraw from the study at any time, including withdrawing collected data after an agreed timeframe?                                                                                                             | <input checked="" type="checkbox"/> | <input type="checkbox"/> |
| Will participants be treated with dignity and respect at all times?                                                                                                                                                                           | <input checked="" type="checkbox"/> | <input type="checkbox"/> |
| Will the participants be provided with your University contact details, and those of your supervisor, so that they may get in touch about any aspect of the research?                                                                         | <input checked="" type="checkbox"/> | <input type="checkbox"/> |
| Will a signed copy of the consent form be retained by the researcher and another by the participant?                                                                                                                                          | <input checked="" type="checkbox"/> | <input type="checkbox"/> |

If you have answered 'no' to any of the questions about data collection, please explain why, and describe any steps you will take to deal with the ethical issues raised in the box below:

## Reference number: Ethical Approval Number BIO-1718-0004

| <b>4.4: Questions about data confidentiality and storage</b>                                                                                                                                                                                 | <b>Yes</b>                          | <b>No</b>                |
|----------------------------------------------------------------------------------------------------------------------------------------------------------------------------------------------------------------------------------------------|-------------------------------------|--------------------------|
| Will data only be used for the purposes outlined within the Participant Consent Form and Information Sheet?                                                                                                                                  | <input checked="" type="checkbox"/> | <input type="checkbox"/> |
| Where anonymity has been agreed with the participant, will data be anonymized as soon as possible after collection?                                                                                                                          | <input checked="" type="checkbox"/> | <input type="checkbox"/> |
| Will all personal data which could identify individual participants be inaccessible to everyone other than the researcher, their supervisor and internal and/or external examiners without participants' explicit consent?                   | <input checked="" type="checkbox"/> | <input type="checkbox"/> |
| Will you inform your supervisor and/or the School's REO and (if necessary) statutory services of any incidents of actual or suspected harm of children or vulnerable adults which are disclosed to you during the course of data collection? | <input checked="" type="checkbox"/> | <input type="checkbox"/> |
| Will participants be given the opportunity to know about the overall research findings?                                                                                                                                                      | <input checked="" type="checkbox"/> | <input type="checkbox"/> |
| Will all research data be managed and retained in accordance with the requirements of the University's Code of Research Conduct and Research Ethics and the School's Research Data Management Plan?                                          | <input checked="" type="checkbox"/> | <input type="checkbox"/> |

If you have answered 'no' to any of the questions about data confidentiality and storage, please explain why, and describe any steps you will take to deal with the ethical issues raised in the box below:

**Section 5: Ethical approval**

**DECLARATION OF ETHICAL RESEARCH**

By signing this form I agree to work within the protocol which I have outlined and to abide by the University of Nottingham's Code of Research Ethics. If I make any changes to my protocol which would change my answers to any of the questions above I will submit a new form to my supervisor or module convener and to **Redacted**.

**12<sup>th</sup> March 2018**

.....  
*Signature of applicant*

.....  
*Date*

**AUTHORISATION**

Having reviewed the ethical issues arising from the proposed research, I authorise the research to go ahead.

.....  
*Signature of supervisor*

.....  
*Date*

The School's Research Ethics Committee authorises the research to go ahead as described.

.....  
*Signature of REC / REO*

.....  
*Date*

**Please remember to enclose all of the documentary evidence required to support your application, as indicated in the checklist on the front page of this application**

## Reference number: Ethical Approval Number BIO-1718-0004

### Appendix A: Information Sheet for Participants / Tsamba la unthenga wachidziwitso kwa otenga nawo mbali: “GeoNutrition (Work Package 1): Sampling soils and crops in Malawi / Kutenga ma sampulo a dothi ndi mbewu ku Malawi”

**Invitation:** You are being invited to be involved in a research study; before you decide whether you want to take part, it is important for you to understand why the research is being done and what your participation will involve. Please read the following information carefully and discuss it with other people if you wish. Please contact me if anything is unclear or if you would like more information. Take time to decide whether or not you wish to take part.

**Pempho:** Mukupemphedwa kuti mutenge nawo gawo mu kafukufuku; koma musanasankhe kutero, ndikofunikira kwa inu kuti mumvetsetse cholinga chakafukufukuyu komanso zofunikira zakutenga nawo mbali kwanu. Chonde werengani unthenga otsatirawu moyenera ndi kukambirana ndi anzanu ngati mungafune kutero. Chonde ndiimbireni ngati pali chinachilichonse chomwe simukumvetsetsa kapena ngati mungafune unthenga owonjezera. Tengani nthawi yanu ndithu kulingalira musanasankhe kuvomera kutenga nawo gawo mu kafukufuku kapena kusatenga nawo mbali.

**What is the purpose of this study?** The aim of this study is to understand how soil quality affects the nutritional value of cereal grains growing in those fields.

**Kodi cholinga chakafukufukuyu ndi chiyani?** Cholinga chakafukufukuyu ndikufuna kumvetsetsetsa m'mene chonde cha dothi chimakhudzira mlingo wa thanzi ndi michere yamu njere za mbewu zolimbitsa thupi monga chimanga, mpunga, mapira, mchewere, mawere ndi tirigu zolimidwa mu dothilo.

**Why I have been chosen?** You are randomly selected because you grow cereal grain within Malawi/Ethiopia. There is no specific reason other than this.

**Ndichifukwa chiyani ndasankhidwa?** Mwasankhidwa mwachisawawa chifukwa chakuti mumalima mbewu za chakudya cholimbitsa thupi mu Malawi kapena Ethiopia. Palibenso chifukwa china chikhazikika kuposa ichi.

**What will participation involve?** You will be asked questions about your field, soils, crops, and how you manage these. Your responses will be written down on a tablet. We will then ask to take a small sample of soil and cereal grain from your field (or crop store).

**Kutenga nawo mbali kwanga kufunika chiyani?** Mudzafunsidwa mafunso okhudza munda wanu, mbewu zanu komanso njira zomwe mumazisamalira izi. Mayankho anu azalembedwa pa maikina a m'manja.. Tikatero tidzatenga nawo sampulo ya dothi ndi mbewu yanu ya chakudya cholimbitsa thupi kuchokera m'munda mwanu kapena mu nkhekwe yanu.

**What if I decide that I don't want to take part?** You are free to decide that you don't want to take part in the study and can:

1. Refuse to answer any questions that you don't want to
2. Decide to stop the interview at any time
3. Remove your consent for the data collected to be used.

**Nanga nditasankha kusatenga nawo mbali?** Muli ndi ufulu wosankha kusatenga nawo mbali mu kafukufukuyu ndipo mutha kuchitanso izi:



## Reference number: Ethical Approval Number BIO-1718-0004

1. Kukana kuyankha mafunso amene simukufuna kuyankha
2. Kusankha kusiya kufunsidwaku pa nthawi ina iliyonse
3. Kuletsa chilolezo chomwe munapereka kuti unthenga omwe mwapeleka ukagwiritsidwe ntchito.

**Will I be paid for my time?** There is no payment for taking part in this questionnaire.

**Kodi ndilipilidwa ku nthawi yanga yomwe ndipelekeyi?** Kulibe malipilo ena aliwonse amene mupatsidwe chifukwa chotenga nawo mbali yoyankha mafunsowa.

**Will I be anonymous, and who will know my identity?** If you agree to take part in an interview, a Participant Number will be generated for you, and that's the only thing that will be used to identify you. Your identity will only be known by the interviewer, and will not be found in any record. Hard copy and electronic data will be stored on the University of Nottingham's computer network: this will be deleted after 7 years, or if you withdraw your consent (whichever is sooner).

**Kodi sindidzatchulidwa dzina, komanso adzadziwe chizindikiro change ndi ndani?** Ngati mwavomera kutenga nawo gawo loyankha mafunsowa, tidzapanga nambala yoimira otenga nawo mbali mukafukufukuyu ndipo ichi ndi chinthu chokhacho chomwe tidzagwiritse ntchito pofuna kuzindikira mayankkho anu. Chizindikiro chanu chidzadzizika ndi okufunsani mafunso yekha ndipo sizizapezeka muzolembedwa zina zilizonse. Uthenga wopelekedwa wamumapepala ndi wosungidwa mu makina udzasungidwa mu makina a compuyuta aku sukulu yaukachenjede ya Nottingham: unthengawu udzafufutidwa pakadzatha dzaka zisanu ndi ziwiri kapena nthawi ina iliyonse zisanakwane zakazi pamene inu mwasankha kulanda chilolezo chakuti unthenga omwe munapeleka usungidwe ndi kugwiritsidwa ntchito.

**Who shall I contact with any questions?** Please contact the Principal Investigators, **Redacted** (Lilongwe University of Agriculture and Natural Resources, LUANAR); **Redacted** (University of Nottingham, UK). Emails: **Redacted**. In the event of any complaint, please can you contact **Redacted**, PhD, Director of Research and Outreach, Lilongwe University of Agriculture and Natural Resources (LUANAR). Cell: **Redacted**; Email: **Redacted**.

**Ngati ndili ndimafunso ndingalumikizane ndi ndani?** Chonde lumikizani ndi wotsogolera kafukufukuyu, a **Redacted** aku sukulu ya ukachenjede ya zaulimi (Lilongwe University of Agriculture and Natural Resources, LUANAR); **Redacted** a ku sukulu ya ukachenjede ya Nottingham (University of Nottingham, UK). Keyala: **Redacted**. Ngati mungakhale ndi dandaulo lililonse, chonde lumikizananani ndi wamkulu wa kafukufuku ndi kufalitsa, **Redacted** ku sukulu ya ukachenjede ya zaulimi, Lilongwe University of Agriculture and Natural Resources (LUANAR). Keyala: Cell: **Redacted**; Email: **Redacted**.

## Reference number: Ethical Approval Number BIO-1718-0004

### Appendix B: Consent Form / Fomu yachilolezo

You have been invited to take part in a research project; in order to go forward with your participation, it is necessary for you to give your consent.

Mwasankhidwa kuti mutenge nawo gawo mukafukufuku; kuti mupitilire kutenga nawo mbali mukafukufukuyu, ndikoyenera kuti inu mupeleke chilolezo chanu.

By completing this form you are consenting to take part in this research project; you can withdraw your consent at any point. To withdraw your consent, please either mention that to the Interviewer during the interview or contact **Redacted** (Lilongwe University of Agriculture and Natural Resources, LUANAR) and/or **Redacted** **Redacted** (University of Nottingham, UK) **before 20 June 2018**.

Poyankha ndi kusayinira fomu iyi mukupeleka chilolezo chotenga nawo mbali mukafukufukuyu; koma mutha kulanda chilolezo chanu nthawi ina iliyonse. Ngati mwafuna kulanda chilolezo chanu, chonde afotokozereni okufunsani mafunso munthawi yomwe mukucheza nawoyo kapena lumikizanani ndi a **Redacted** aku sukulu ya ukachenjeda ya zaulimi (Lilongwe University of Agriculture and Natural Resources, LUANAR); **Redacted** a ku sukulu ya ukachenjeda ya Nottingham (University of Nottingham, UK) **pasanafike pa 20 June, 2018**.

Before signing this form, please read the following statements and indicate that you agree with them by initialling next to them.

Musanasayine fomu imeneyi, chonde werengani mfundo zotsatirazi ndikuonetsa kuti mukuvomereza poyika malembo oyambirira a mayina anu kutsogolo kwa mfundozi.

| <b>GID#</b>                                                                                                                                                                                  | Tick here<br>Lembani<br>Chizindikiro<br>cha:<br>✓ |
|----------------------------------------------------------------------------------------------------------------------------------------------------------------------------------------------|---------------------------------------------------|
| I have been issued with a Participant Information Sheet<br>Ndapatsidwa pepala lopeleka unthenga kwa otenga nawo mbali                                                                        |                                                   |
| I have been informed what the purpose of this research is, and the nature of the study<br>Ndadziwitsidwa cholinga chakafukufukuyu komanso ndondomeko yakafukufukuyu                          |                                                   |
| I have been informed how the data that are collected within the research will be handled and stored.<br>Ndadziwitsidwa kasamalidwe ndi kasungidwe ka unthenga womwe udzatoledwe mukafufukuyu |                                                   |
| I have been informed that I can remove my consent at any time either during, or after the interview (up to 20 June 2018), and that withdrawal of consent will not harm me in                 |                                                   |

**Reference number: Ethical Approval Number BIO-1718-0004**

|                                                                                                                                                                                                                                           |  |
|-------------------------------------------------------------------------------------------------------------------------------------------------------------------------------------------------------------------------------------------|--|
| any way.<br><br>Ndadziwitsidwa m'mene ndingalandire chilolezo chomwe ndingapeleke mu nthawi ina iliyonse yoyankha mafunsowa kapena pasanafike pa (20 June 2018) ndipo chiletso changa sichidzakhala ndi vuto liri lonse pa ine            |  |
| I have been informed that the interview will be written down on tablet<br><br>Ndadziwitsidwa kuti unthenga womwe ndipeleke mumachezawa ulembedwa mumakina a m'manja                                                                       |  |
| I have been informed that my anonymised quotes may be used within the reporting of this research.<br><br>Ndadziwitsidwa kuti zoyankhula zanga zenizeni zitha kugwiritsidwa ntchito mu malipoti akafukufukuyu koma sindidzatchulidwa dzina |  |
| I agree to take part in this study<br><br>Ndavomera kutenga nawo mbali mukafukufukuyu                                                                                                                                                     |  |

Signed by.....Date.....

Wosayina.....Tsiku.....

Consent received by.....Date.....

Wotenga chiloleza.....Tsiku.....

# Reference number: Ethical Approval Number BIO-1718-0004

## Appendix C: Participant List

| Name                | Job Title and Institution                                                                                                                                 | Email | Institute   | Country | Management Role  | Project Role                        |
|---------------------|-----------------------------------------------------------------------------------------------------------------------------------------------------------|-------|-------------|---------|------------------|-------------------------------------|
| Dawd Gashu          | Assistant Professor, Center for Food Science and Nutrition, Addis Ababa University                                                                        |       | AAU         | ETH     | AAU Lead         | Nutritionist                        |
| Tegbaru Bellele     | EthioSIS Project Team Leader, Ethiopian Agricultural Transformation Agency                                                                                |       | ATA/MoA     | ETH     | ATA Lead         | Soil Scientist                      |
| Kiflu Gudeta        | Senior GIS Expert, Acting Director at Ministry of Agriculture and Natural Resource, Ministry of Agriculture and Natural Resource, Ethiopia                |       | ATA/MoA     | ETH     |                  | GIS                                 |
| Sam Gameda          | Senior Soil Scientist, International Maize and Wheat Improvement Center                                                                                   |       | CIMMYT      | ETH     | CIMMYT Lead      | Agronomist / Soil Scientist         |
| Adamu Belay         | Nutritionist, Ethiopian Public Health Institute                                                                                                           |       | EPHI        | ETH     | EPHI Lead        | Nutritionist                        |
| Diinesaw Zerfu      | Associate Researcher, Ethiopian Public Health Institute                                                                                                   |       | EPHI        | ETH     |                  | Nutritionist                        |
| Solomon Eshetu      | Food Science and Nutrition Research Directorate, Ethiopian Public Health Institute                                                                        |       | EPHI        | ETH     |                  | Nutritionist                        |
| Tesfaye Hailu       | Nutritionist, Ethiopian Public Health Institute                                                                                                           |       | EPHI        | ETH     |                  | Advisor                             |
| Tilahun Amede       | Principal Scientist, Natural Resources and Systems Agronomy, International Crops Research Institute for the Semi-Arid Tropics (ICRISAT), Ethiopia         |       | ICRISAT     | ETH     | ICRISAT Lead     | Agronomist / Soil Scientist         |
| Louise Ander        | Environmental Process Geochemist, British Geological Survey                                                                                               |       | BGS         | GBR     | BGS Lead         | Data management / training          |
| Edward Joy          | Research Fellow in Nutrition and Sustainability, London School of Hygiene & Tropical Medicine                                                             |       | LSHTM       | GBR     | LSHTM Lead       | Nutritionist / macroeconomics       |
| Alan Dangour        | Professor of Nutrition, London School of Hygiene & Tropical Medicine                                                                                      |       | LSHTM       | GBR     |                  | Nutritionist                        |
| Elaine Ferguson     | Senior Lecturer, London School of Hygiene & Tropical Medicine                                                                                             |       | LSHTM       | GBR     |                  | Nutritionist                        |
| Joanna Sturgess     | Research Fellow, London School of Hygiene and Tropical Medicine                                                                                           |       | LSHTM       | GBR     |                  | Nutritionist / logistics            |
| Kirsten Dawes       | Project Administrator, London School of Hygiene and Tropical Medicine                                                                                     |       | LSHTM       | GBR     |                  | Research administration             |
| Liz Allen           | Professor, Epidemiology and Statistics, London School of Hygiene & Tropical Medicine                                                                      |       | LSHTM       | GBR     |                  | Epidemiology / statistics           |
| Steve McGrath       | Professor of Sustainable Agricultural Sciences, Rothamsted Research                                                                                       |       | RRes        | GBR     | RRes/AFSIS Lead  | Soil Scientist                      |
| Alice Milne         | Spatial Statistician, Sustainable Agricultural Sciences, Rothamsted Research                                                                              |       | RRes        | GBR     |                  | Geostatistics                       |
| Jackie Stroud       | Research Scientist, Sustainable Agricultural Sciences, Rothamsted Research                                                                                |       | RRes        | GBR     |                  | Soil Scientist                      |
| Stephan Haefele     | Systems Agronomist, Sustainable Agriculture Sciences, Rothamsted Research                                                                                 |       | RRes        | GBR     |                  | Agronomist                          |
| Martin Broadley     | Professor of Plant Nutrition, University of Nottingham                                                                                                    |       | UoN         | GBR     | UoN/Overall lead | Project manager, crop nutrition     |
| Diriba Kumssa       | Research Fellow, GIS, University of Nottingham                                                                                                            |       | UoN         | GBR     |                  | GIS / data management / web manag   |
| Joanna Smuga Lumatz | Project Administrator, University of Nottingham                                                                                                           |       | UoN         | GBR     |                  | Research administration             |
| Kate Millar         | Bioethicist and Director of Centre for Applied Bioethics, University of Nottingham                                                                        |       | UoN         | GBR     |                  | Bioethics                           |
| Liz Bailey          | Lecturer in Environmental Science, University of Nottingham                                                                                               |       | UoN         | GBR     |                  | Soil Chemist                        |
| Lolita Wilson       | Laboratory Manager, University of Nottingham                                                                                                              |       | UoN         | GBR     |                  | Senior technician                   |
| Abdul Mossa         | Senior Technician, University of Nottingham                                                                                                               |       | UoN         | GBR     |                  | Senior technician                   |
| Murray Lark         | Geoinformatics, University of Nottingham                                                                                                                  |       | UoN         | GBR     |                  | Geostatistics                       |
| Scott Young         | Associate Professor and Reader in Environmental Science, University of Nottingham                                                                         |       | UoN         | GBR     |                  | Soil Chemist                        |
| Simon Langley-Evans | Professor of Human Nutrition, University of Nottingham                                                                                                    |       | UoN         | GBR     |                  | Nutritionist                        |
| Hugo de Groot       | Agricultural Economist/Principal Scientist, International Maize and Wheat Improvement Center (CIMMYT), Kenya                                              |       | CIMMYT      | KEN     |                  | Economist                           |
| Ermas Betemariam    | Landscape Ecologist, World Agroforestry Centre (ICRAF)                                                                                                    |       | ICRAF       | KEN     |                  | Ecologist                           |
| Keith Shepherd      | Principal Soil Scientist, World Agroforestry Centre                                                                                                       |       | ICRAF       | KEN     |                  | Soil Scientist                      |
| Ben Chilima         | Deputy Director, Community Health Services, Ministry of Health, Malawi                                                                                    |       | CHSU        | MWI     | CHSU Lead        | Public Health Policy                |
| Wilksom Makumba     | Director of Department of Agricultural Research Services, Malawi Ministry of Agriculture                                                                  |       | DARS        | MWI     | DARS Lead        | Agricultural Research Services Lead |
| Moses Munthali      | Senior Soil and Plant Nutrition Scientist, Malawi Ministry of Agriculture                                                                                 |       | DARS        | MWI     |                  | Soil Scientist                      |
| Ivy Ligowe          | Research Scientist, Dept. Agricultural Research Services; PhD Student, Dept. Crop & Soil Sciences, Lilongwe University of Agriculture & Natural Resources |       | DARS/LUANAF | MWI     |                  | Soil Scientist                      |
| Felix Phiri         | Director of Nutrition, the Department of Nutrition, HIV and AIDS, Ministry of Health, Malawi                                                              |       | DNHA        | MWI     | DNHA Lead        | Nutrition Policy                    |
| Patson Nalivata     | Department of Crop and Soil Sciences, Lilongwe University of Agriculture and Natural Resources                                                            |       | LUANAR      | MWI     | LUANAR Lead      | Soil Scientist                      |
| Alexander Kalimira  | Human Nutritionist, Head, Department of Human Nutrition and Health                                                                                        |       | LUANAR      | MWI     |                  | Nutritionist                        |
| Allan Chilimba      | Agriculture and Soils Consultant, Malawi                                                                                                                  |       | N/A         | MWI     |                  | Soil Scientist                      |
| Joseph Mfuto-Bengo  | Professor of Bioethics and Director of Centre for Bioethics at the College of Medicine at the University of Malawi                                        |       | UNIMA       | MWI     | UNIMA Lead       | Bioethics                           |

Redacted
